# Supplementary material
Source: publisher figshare collection journal article supplement (https://acs.figshare.com/ndownloader/files/14987264)
Supplement: Supplementary file 1 [file 14987264]

# Supporting Information

## Enhancement of Hydrogen Evolution Reaction Performance of Graphitic Carbon Nitride with Incorporated Nickel Boride

Meng Cao<sup>†</sup>, Xinyu Zhang<sup>\*,†</sup>, Jiaqian Qin <sup>\*,‡,§</sup>, and Riping Liu<sup>†</sup>

<sup>†</sup>State Key Laboratory of Metastable Materials Science and Technology, Yanshan  
University, Qinhuangdao 066004, P. R. China

<sup>‡</sup>Metallurgy and Materials Science Research Institute, Chulalongkorn University,  
Bangkok 10330, Thailand

<sup>§</sup>Research Unit of Advanced Materials for Energy Storage, Chulalongkorn University,  
Bangkok, Thailand

Number of pages: 9

Number of Figures: 6

Number of Tables: 2

Figure S1. SEM image of Ni<sub>2</sub>B.

Figure S2. TEM image of Ni<sub>2</sub>B.

Figure S3. The TEM image and the corresponding elemental mapping for B, Ni, N, C,  
respectively.

Figure S4. AFM images of (a)NC-5 and (b)CN-0.

Figure S5.XRD patterns of Ni<sub>2</sub>B (a) and Ni<sub>2</sub>B modified g-C<sub>3</sub>N<sub>4</sub>.

Figure S6.XPS High-resolution spectrum of Ni<sub>2</sub>B sample on (a)B 1s and (b)Ni 2p.

Figure S7.HER performance of Ni<sub>2</sub>B, NC-5-AE, NC-5 and CN-0 samples. (a)

Polarization curves, and (b) corresponding Tafel plots

## **Supporting Information**

### **Enhancement of Hydrogen Evolution Reaction Performance of Graphitic Carbon Nitride with Nickel Boride Incorporated**

Meng Cao<sup>†</sup>, Xinyu Zhang<sup>\*†</sup>, Jiaqian Qin <sup>\*‡§</sup>, and Riping Liu<sup>†</sup>

<sup>†</sup>State Key Laboratory of Metastable Materials Science and Technology, Yanshan  
University, Qinhuangdao 066004, P. R. China

<sup>‡</sup>Metallurgy and Materials Science Research Institute, Chulalongkorn University,  
Bangkok 10330, Thailand

<sup>§</sup>Research Unit of Advanced Materials for Energy Storage, Chulalongkorn University,  
Bangkok, Thailand

**\*Corresponding Author.** Fax: +66 2611 7586

E-mail: [jiaqian.q@chula.ac.th](mailto:jiaqian.q@chula.ac.th) (J. Qin), [xyzhang@ysu.edu.cn](mailto:xyzhang@ysu.edu.cn) (X. Zhang)

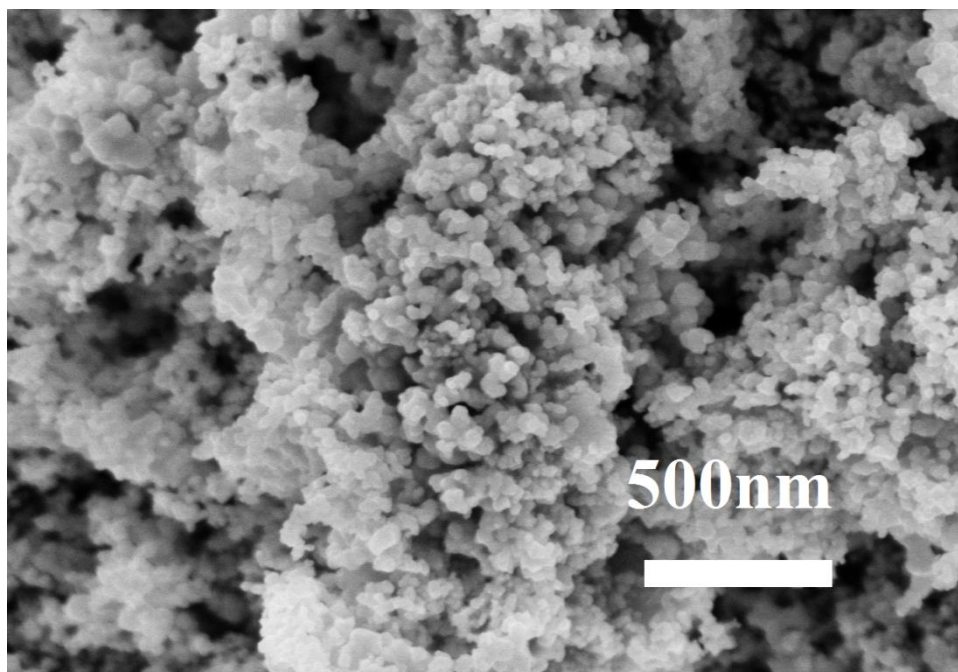

Figure S1. SEM image of Ni<sub>2</sub>B.

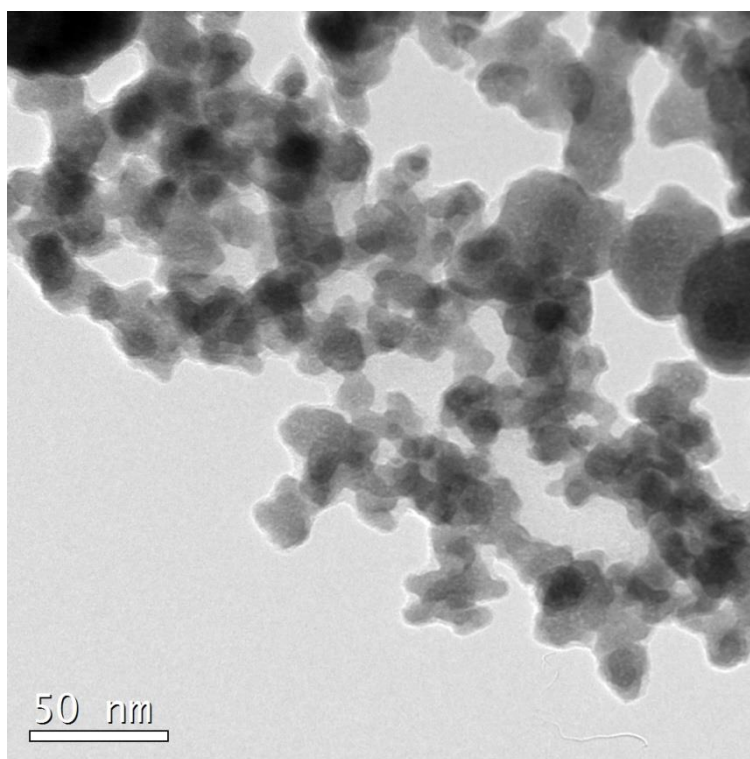

Figure S2. TEM image of Ni<sub>2</sub>B.

The SEM and TEM spectra exhibit the granular morphology of Ni<sub>2</sub>B precursor.

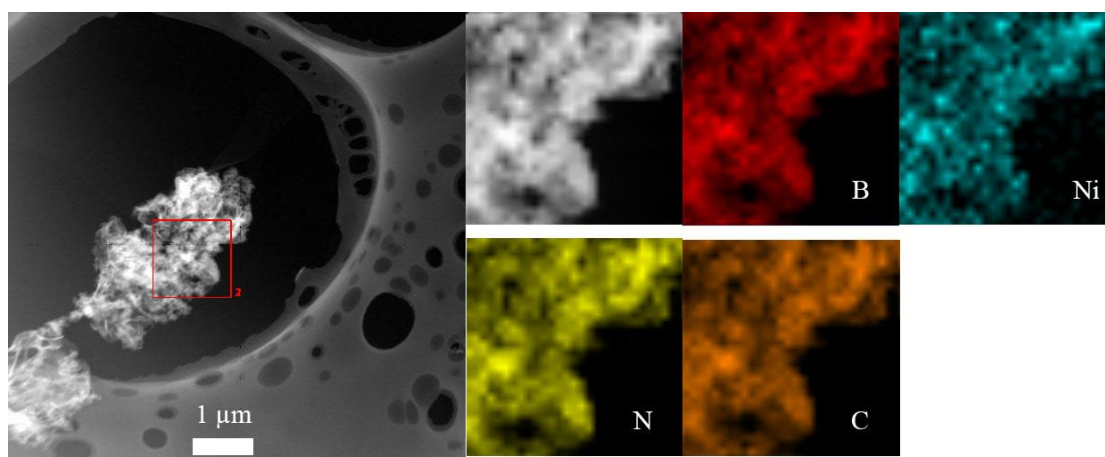

Figure S3. The TEM image and the corresponding elemental mapping for B, Ni, N, C, respectively.

The elemental mappings revealed the coexistent and homogeneous distribution of Ni and B elements on g-C<sub>3</sub>N<sub>4</sub> sheets.

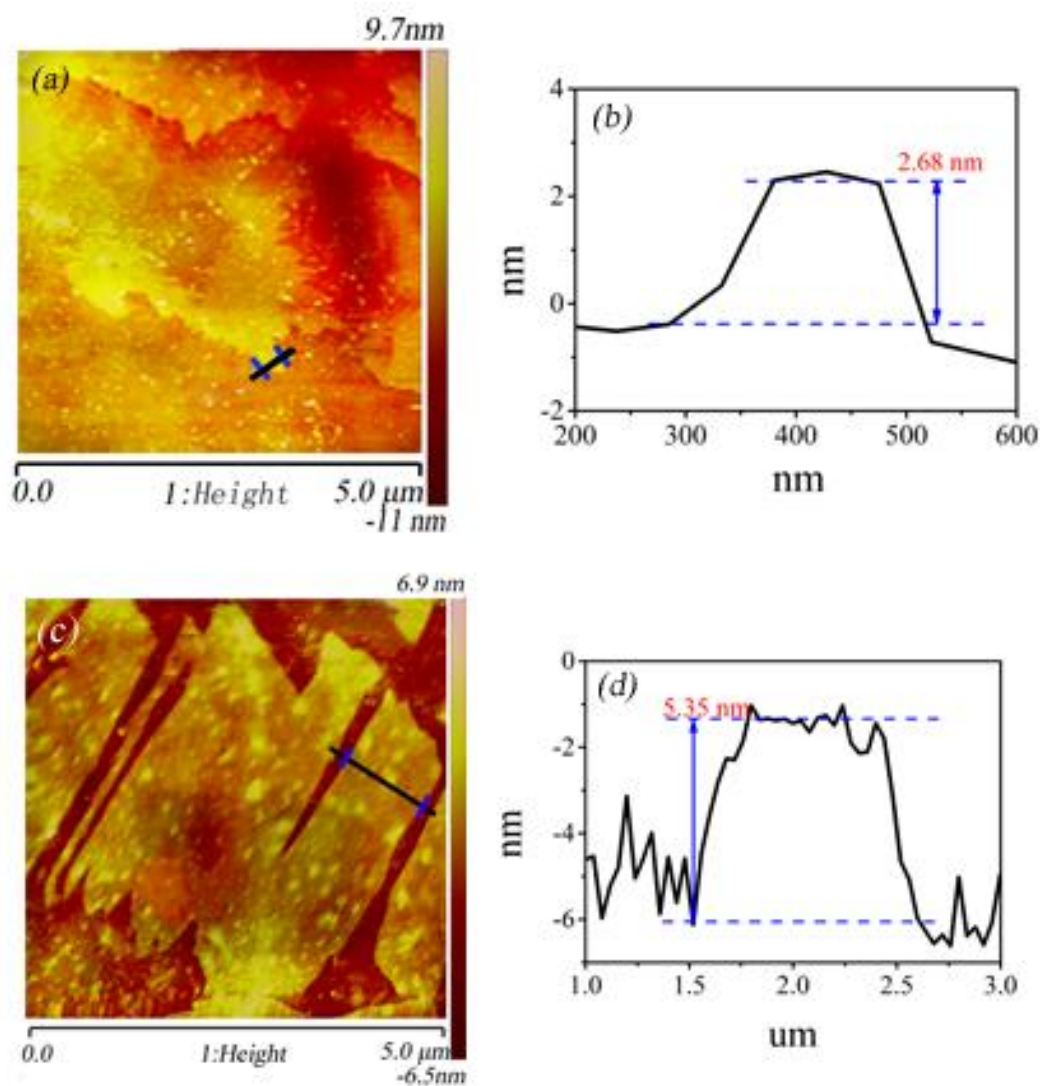

Figure S4. AFM images of (a)NC-5 and (b)CN-0.

Stacked layers can be observed from AFM images, the height can correspond to the thickness of the  $\text{g-C}_3\text{N}_4$  layers. The  $\text{Ni}_2\text{B}$  modified  $\text{g-C}_3\text{N}_4$  layers displayed thinner layers at thickness of 2.68 nm meanwhile thickness of pure  $\text{g-C}_3\text{N}_4$  was 5.35 nm.

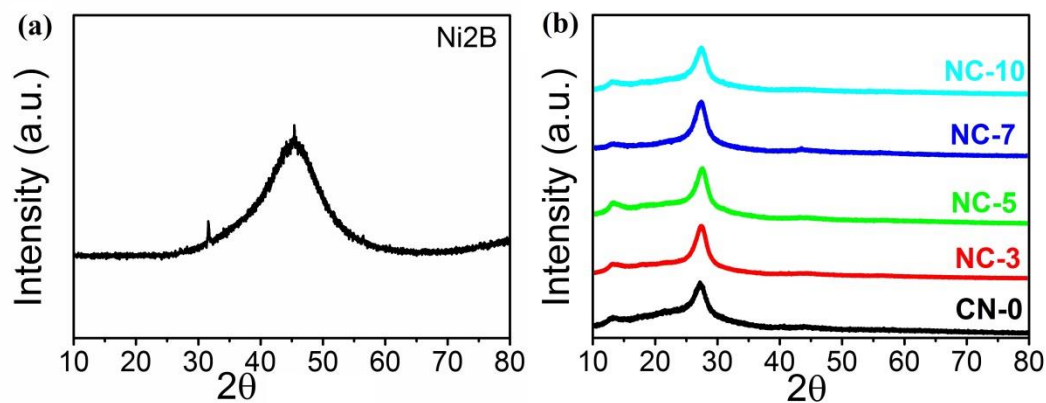

Figure S5. XRD patterns of Ni<sub>2</sub>B (a) and Ni<sub>2</sub>B modified g-C<sub>3</sub>N<sub>4</sub>.

XRD pattern of Ni<sub>2</sub>B shows a broad peak at  $2\theta = 45^\circ$  indicating the amorphous character of Ni<sub>2</sub>B powders. From the XRD patterns of Ni<sub>2</sub>B modified g-C<sub>3</sub>N<sub>4</sub>, all samples represent the typical diffraction peak at  $27.4^\circ$  and a weaker peak around  $13^\circ$ , which means the incorporation of Ni<sub>2</sub>B doesn't change the graphitic in-plane structure.

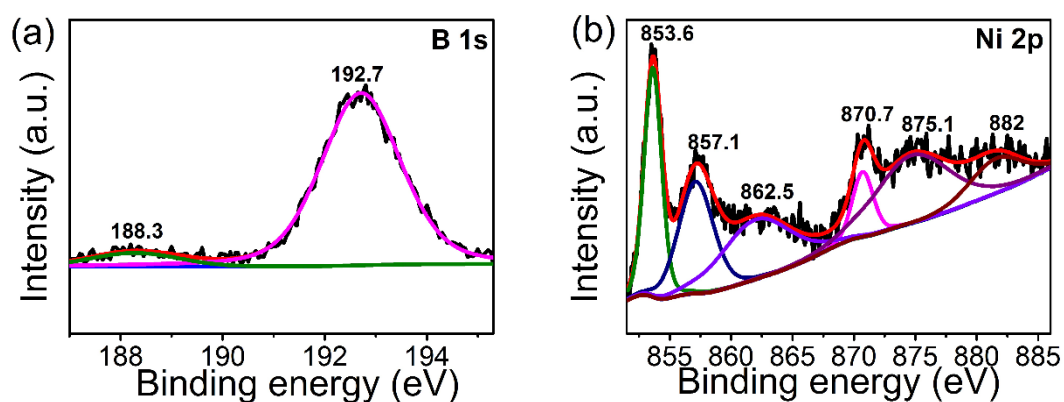

Figure S6. XPS High-resolution spectrum of  $\text{Ni}_2\text{B}$  sample on (a) B 1s and (b) Ni 2p.

The two peaks for B 1s were observed with binding energy (BE) of 188.3 eV and 192.7 eV. they are response to elemental and oxidized boron, respectively. The binding energy of elemental boron in compounds positive shift 1.2 eV compare to pure boron element (with binding energy of 187.1 eV). This shift indicates an electron immigrated from alloying B to vacant d-orbital of metallic Ni which makes boron electron deficient while Ni metals are enriched with the electron in all the catalyst powders. That make the  $\text{Ni}_2\text{B}$  a good active site for HER. The Ni 2p spectrum can deconvoluted into two manifolds, two main peaks located at 853.6 eV and 870.7 eV corresponded to metallic Ni and satellite peaks around 857.1 eV and 875.1 eV which attributed to Ni  $2p_{3/2}$  and Ni  $2p_{1/2}$ , the peak at 862.5 eV related to oxidized Ni compounds<sup>1-2</sup>.

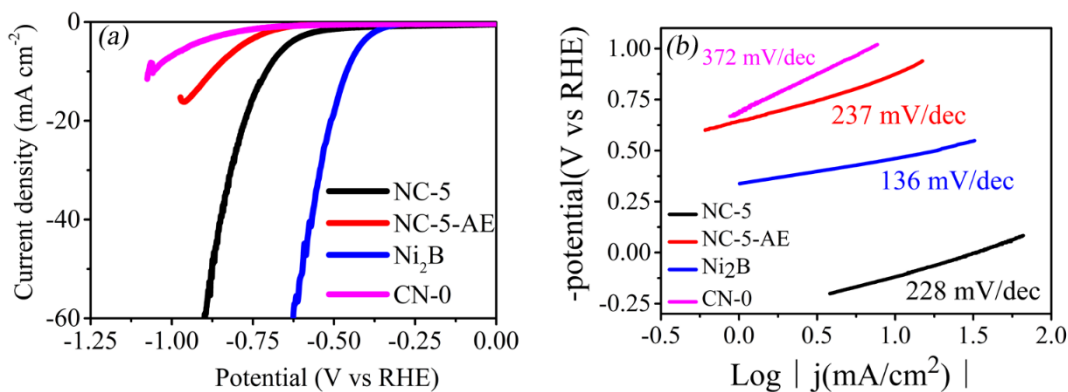

Figure S7.HER performance of Ni<sub>2</sub>B, NC-5-AE, NC-5 and CN-0 samples  
(a) Polarization curves, and (b) corresponding Tafel plots

The NC-5 was sonicated in 10% hydrochloric acid for 30 min to remove the nickel ions doped in the sample, and then washed three times with deionized water and alcohol, and then vacuum dried in an oven at 60 °C for 3 hours. The sample obtained is named NC-5-AE. The onset overpotential of Ni<sub>2</sub>B working electrode is 335 mV and the overpotential to drive cathodic current densities of 10 mA cm<sup>-2</sup> reaches 459 mV, meanwhile the onset overpotential of NC-5-AE working electrode is 640 mV and overpotential at cathodic current densities of 10 mA cm<sup>-2</sup> is 875 mV. The Tafel slope (Shown in Fig. S7(b)) of NC-5-AE (~237 mV dec<sup>-1</sup>, and 136 mV dec<sup>-1</sup> for the Ni<sub>2</sub>B particle working electrode) is much lower than pure g-C<sub>3</sub>N<sub>4</sub> samples (372 mV dec<sup>-1</sup>), it proved the Ni<sub>2</sub>B particles incorporated on g-C<sub>3</sub>N<sub>4</sub> layers can really enhance the electrocatalyst performance.



Table S1. The list of electrocatalytic parameters of the Pt/C, pure g-C<sub>3</sub>N<sub>4</sub>, and the Ni<sub>2</sub>B modified g-C<sub>3</sub>N<sub>4</sub>.

| <b>cathode</b> | Onset<br>overpotential<br>(mV) | Overpotential at<br>current density of<br>10mA/cm <sup>2</sup><br>(mV) | Overpotential at<br>current density of<br>20mA/cm <sup>2</sup><br>(mV) | Slope of Tafel<br>plot(mV/dec) |
|----------------|--------------------------------|------------------------------------------------------------------------|------------------------------------------------------------------------|--------------------------------|
| <b>Pt/C</b>    | 4                              | 56                                                                     |                                                                        | 36                             |
| <b>CN-0</b>    | 686                            | 1056                                                                   |                                                                        | 372                            |
| <b>NC-3</b>    | 248                            | 900                                                                    |                                                                        | 348                            |
| <b>NC-5</b>    | 300                            | 707                                                                    | 773                                                                    | 221                            |
| <b>NC-7</b>    | 359                            | 915                                                                    |                                                                        | 350                            |
| <b>NC-10</b>   | 503                            | 923                                                                    | 1031                                                                   | 339                            |

Table S2. Comparison of electrocatalytic performance for g-C<sub>3</sub>N<sub>4</sub>-based catalysts

| Catalyst                                            | Current density        | overpotential | Tafel slope | reference         |
|-----------------------------------------------------|------------------------|---------------|-------------|-------------------|
| Ni <sub>2</sub> B/g-C <sub>3</sub> N <sub>4</sub>   | 10 mA cm <sup>-2</sup> | 707 mV        | 221 mV/dec  | this work         |
| Ni/g-C <sub>3</sub> N <sub>4</sub>                  | 10 mA cm <sup>-2</sup> | 760 mV        |             | Ref. <sup>3</sup> |
| Zn/g-C <sub>3</sub> N <sub>4</sub>                  | 10 mA cm <sup>-2</sup> | 800 mV        |             | Ref. <sup>3</sup> |
| Fe/g-C <sub>3</sub> N <sub>4</sub>                  | 10 mA cm <sup>-2</sup> | 770 mV        |             | Ref. <sup>3</sup> |
| Co/g-C <sub>3</sub> N <sub>4</sub>                  | 10 mA cm <sup>-2</sup> | 730 mV        |             | Ref. <sup>3</sup> |
| Cu/g-C <sub>3</sub> N <sub>4</sub>                  | 10 mA cm <sup>-2</sup> | 390 mV        | 112 mV/dec  | Ref. <sup>3</sup> |
| Ni/C <sub>3</sub> N <sub>4</sub>                    | 10 mA cm <sup>-2</sup> | 222 mV        | 128 mV/dec  | Ref. <sup>4</sup> |
| TC@WO <sub>3</sub> @g-C <sub>3</sub> N <sub>4</sub> | 10 mA cm <sup>-2</sup> | 535 mV        | 246 mV/dec  | Ref. <sup>5</sup> |
| g-C <sub>3</sub> N <sub>4</sub> @Ni-NiO             | 10 mA cm <sup>-2</sup> | 725 mV        | 286 mV/dec  | Ref. <sup>5</sup> |

1. Fernandes, R.; Patel, N.; Miotello, A.; Filippi, M., Studies on catalytic behavior of Co–Ni–B in hydrogen production by hydrolysis of NaBH<sub>4</sub>. *Journal of Molecular Catalysis A: Chemical* **2009**, *298*, 1-6.
2. Yan, X.; Tian, L.; Chen, X., Crystalline/amorphous Ni/NiO core/shell nanosheets as highly active electrocatalysts for hydrogen evolution reaction. *J. Power Sources* **2015**, *300*, 336-343.
3. Zou, X.; Silva, R.; Goswami, A.; Asefa, T., Cu-doped carbon nitride: Bio-inspired synthesis of H<sub>2</sub>-evolving electrocatalysts using graphitic carbon nitride (g-C<sub>3</sub>N<sub>4</sub>) as a host material. *Appl. Surf. Sci.* **2015**, *357*, 221-228.
4. Wang, L.; Li, Y.; Yin, X.; Wang, Y.; Song, A.; Ma, Z.; Qin, X.; Shao, G., Coral-like-Structured Ni/C<sub>3</sub>N<sub>4</sub> Composite Coating: An Active Electrocatalyst for Hydrogen Evolution Reaction in Alkaline Solution. *ACS Sustain. Chem. Eng.* **2017**, *5*, 7993-8003.
5. Kumar, M. P.; Murugesan, P.; Vivek, S.; Ravichandran, S., NiWO<sub>3</sub> Nanoparticles Grown on Graphitic Carbon Nitride (g-C<sub>3</sub>N<sub>4</sub>) Supported Toray Carbon as an Efficient Bifunctional Electrocatalyst for Oxygen and Hydrogen Evolution Reactions. *Part. Part. Syst. Char.* **2017**, *34*, 1700043.
